# Supplementary material for: Genetic predisposition to obesity leads to increased risk of type 2 diabetes
Source: PubMed Central journal article supplement — Diabetologia. 2011 Jan 26;54(4):776–82. doi: 10.1007/s00125-011-2044-5 (PMC3052481; doi:10.1007/s00125-011-2044-5), 2011-01-26
Supplement: 125_2011_2044_MOESM1_ESM.pdf [file 125_2011_2044_MOESM1_ESM.pdf]

Electronic supplementary material

ESM Table 1 Genotype information of the 12 obesity susceptibility SNPs

| SNP        | Nearest gene  | Chromosome | Position (bp) <sup>a</sup> | Risk allele | Non-risk allele | Risk allele frequency (%) | HWE test <i>p</i> value | Original reported leading SNP | Reference | <i>r</i> <sup>2</sup> between the genotyped and original SNP |
|------------|---------------|------------|----------------------------|-------------|-----------------|---------------------------|-------------------------|-------------------------------|-----------|--------------------------------------------------------------|
| rs3101336  | <i>NEGR1</i>  | 1          | 72,523,206                 | C           | T               | 0.61                      | 0.27                    | rs2815752                     | 11        | 1.00                                                         |
| rs10913469 | <i>SEC16B</i> | 1          | 176,180,142                | G           | A               | 0.20                      | 0.63                    | rs10913469                    | 12        |                                                              |
| rs6548238  | <i>TMEM18</i> | 2          | 624,905                    | C           | T               | 0.83                      | 0.88                    | rs6548238                     | 11        |                                                              |
| rs7647305  | <i>ETV5</i>   | 3          | 187,316,992                | C           | T               | 0.79                      | 0.08                    | rs7647305                     | 12        |                                                              |
| rs10938397 | <i>GNPDA2</i> | 4          | 45,023,455                 | G           | A               | 0.42                      | 0.14                    | rs10938397                    | 11        |                                                              |
| rs925946   | <i>BDNF</i>   | 11         | 27,623,778                 | T           | G               | 0.31                      | 0.73                    | rs925946                      | 12        |                                                              |
| rs10838738 | <i>MTCH2</i>  | 11         | 47,619,625                 | G           | A               | 0.34                      | 0.15                    | rs10838738                    | 11        |                                                              |
| rs7132908  | <i>FAIM2</i>  | 12         | 48,549,415                 | T           | C               | 0.39                      | 0.37                    | rs7138803                     | 12        | 0.94                                                         |
| rs7498665  | <i>SH2B1</i>  | 16         | 28,790,742                 | G           | A               | 0.40                      | 0.69                    | rs7498665                     | 11        |                                                              |
| rs1121980  | <i>FTO</i>    | 16         | 52,366,748                 | A           | G               | 0.43                      | 0.72                    | rs9939609                     | 8         | 0.84                                                         |
| rs17782313 | <i>MC4R</i>   | 18         | 56,002,077                 | C           | T               | 0.23                      | 0.38                    | rs17782313                    | 10        |                                                              |
| rs368794   | <i>KCTD15</i> | 19         | 3,9012,292                 | A           | T               | 0.67                      | 0.11                    | rs11084753                    | 11        | 1.00                                                         |

<sup>a</sup>Build 35 position

HWE, Hardy–Weinberg equilibrium
