# Supplementary material for: Genetic predisposition to obesity leads to increased risk of type 2 diabetes
Source: PubMed Central journal article supplement — Diabetologia. 2011 Jan 26;54(4):776–82. doi: 10.1007/s00125-011-2044-5 (PMC3052481; doi:10.1007/s00125-011-2044-5), 2011-01-26
Supplement: 125_2011_2044_MOESM2_ESM.pdf [file 125_2011_2044_MOESM2_ESM.pdf]

### Electronic supplementary material

**ESM Table 2** Theoretical power to observe a nominally significant association ( $p < 0.05$ ) of each individual SNP or the genetic predisposition score with type 2 diabetes based on the expected associations presented in Table 2

| SNP                          | Nearest gene  | Power (%)      |                 |                 |
|------------------------------|---------------|----------------|-----------------|-----------------|
|                              |               | Point estimate | 95% lower limit | 95% upper limit |
| rs3101336                    | <i>NEGR1</i>  | 61.9           | 5.0             | 98.8            |
| rs10913469                   | <i>SEC16B</i> | 83.6           | 16.7            | 100.0           |
| rs6548238                    | <i>TMEM18</i> | 99.8           | 83.6            | 100.0           |
| rs7647305                    | <i>ETV5</i>   | 23.6           | 10.7            | 89.2            |
| rs10938397                   | <i>GNPDA2</i> | 98.7           | 62.4            | 100.0           |
| rs925946                     | <i>BDNF</i>   | 99.9           | 87.4            | 100.0           |
| rs10838738                   | <i>MTCH2</i>  | 45.4           | 3.2             | 96.7            |
| rs7132908                    | <i>FAIM2</i>  | 96.3           | 44.4            | 100.0           |
| rs7498665                    | <i>SH2B1</i>  | 63.2           | 5.3             | 98.9            |
| rs1121980                    | <i>FTO</i>    | 100.0          | 100.0           | 100.0           |
| rs17782313                   | <i>MC4R</i>   | 98.1           | 56.0            | 100.0           |
| rs368794                     | <i>KCTD15</i> | 44.7           | 3.3             | 96.6            |
| Genetic predisposition score |               | 100.0          | 100.0           | 100.0           |
