# Supplementary material for: Genetic predisposition to obesity leads to increased risk of type 2 diabetes
Source: PubMed Central journal article supplement — Diabetologia. 2011 Jan 26;54(4):776–82. doi: 10.1007/s00125-011-2044-5 (PMC3052481; doi:10.1007/s00125-011-2044-5), 2011-01-26
Supplement: 125_2011_2044_MOESM3_ESM.pdf [file 125_2011_2044_MOESM3_ESM.pdf]

**Electronic supplementary material**

**ESM Table 3** Association of individual SNPs and genetic predisposition score with type 2 diabetes (including prevalent and incident cases)

| SNP                          | Nearest gene  | Effect size on BMI (kg/m <sup>2</sup> ) |                        | Observed association with type 2 diabetes |                | Expected association with type 2 diabetes <sup>b</sup> | <i>p</i> for difference between expected and observed | Observed association with type 2 diabetes adjusted for BMI |                |
|------------------------------|---------------|-----------------------------------------|------------------------|-------------------------------------------|----------------|--------------------------------------------------------|-------------------------------------------------------|------------------------------------------------------------|----------------|
|                              |               | $\beta^a$ (95% CI)                      | <i>p</i> value         | OR (95% CI)                               | <i>p</i> value |                                                        |                                                       | OR (95% CI)                                                | <i>p</i> value |
| rs3101336                    | <i>NEGR1</i>  | 0.084 (0.010–0.159)                     | 0.027                  | 1.009 (0.927–1.100)                       | 0.830          | 1.014 (1.001–1.026)                                    | 0.925                                                 | 0.988 (0.906–1.079)                                        | 0.791          |
| rs10913469                   | <i>SEC16B</i> | 0.155 (0.062–0.248)                     | 1.12×10 <sup>-3</sup>  | 0.972 (0.873–1.082)                       | 0.604          | 1.026 (1.010–1.041)                                    | 0.332                                                 | 0.943 (0.845–1.051)                                        | 0.288          |
| rs6548238                    | <i>TMEM18</i> | 0.248 (0.151–0.346)                     | 5.82×10 <sup>-7</sup>  | 1.096 (0.977–1.230)                       | 0.117          | 1.041 (1.024–1.058)                                    | 0.380                                                 | 1.058 (0.941–1.190)                                        | 0.346          |
| rs7647305                    | <i>ETV5</i>   | 0.047 (–0.043, 0.138)                   | 0.308                  | 0.934 (0.843–1.034)                       | 0.188          | 1.008 (0.993–1.022)                                    | 0.147                                                 | 0.919 (0.828–1.019)                                        | 0.109          |
| rs10938397                   | <i>GNPDA2</i> | 0.169 (0.092–0.245)                     | 1.58×10 <sup>-5</sup>  | 1.078 (0.989–1.174)                       | 0.088          | 1.028 (1.015–1.041)                                    | 0.282                                                 | 1.050 (0.962–1.146)                                        | 0.278          |
| rs925946                     | <i>BDNF</i>   | 0.228 (0.146–0.311)                     | 5.78×10 <sup>-8</sup>  | 1.042 (0.948–1.145)                       | 0.395          | 1.037 (1.023–1.051)                                    | 0.922                                                 | 1.001 (0.909–1.103)                                        | 0.977          |
| rs10838738                   | <i>MTCH2</i>  | 0.069 (–0.011–0.148)                    | 0.090                  | 0.984 (0.899–1.076)                       | 0.720          | 1.011 (0.998–1.024)                                    | 0.554                                                 | 0.961 (0.877–1.053)                                        | 0.399          |
| rs7132908                    | <i>FAIM2</i>  | 0.149 (0.073–0.225)                     | 1.22×10 <sup>-4</sup>  | 1.023 (0.938–1.115)                       | 0.610          | 1.025 (1.012–1.038)                                    | 0.968                                                 | 0.994 (0.910–1.086)                                        | 0.902          |
| rs7498665                    | <i>SH2B1</i>  | 0.094 (0.019–0.168)                     | 0.013                  | 1.013 (0.931–1.103)                       | 0.757          | 1.015 (1.003–1.027)                                    | 0.971                                                 | 0.998 (0.915–1.087)                                        | 0.957          |
| rs1121980                    | <i>FTO</i>    | 0.327 (0.252–0.402)                     | 1.31×10 <sup>-17</sup> | 1.092 (1.004–1.189)                       | 0.040          | 1.054 (1.040–1.068)                                    | 0.412                                                 | 1.032 (0.947–1.125)                                        | 0.472          |
| rs17782313                   | <i>MC4R</i>   | 0.182 (0.095–0.269)                     | 4.22×10 <sup>-5</sup>  | 1.055 (0.957–1.163)                       | 0.279          | 1.029 (1.015–1.044)                                    | 0.621                                                 | 1.014 (0.919–1.120)                                        | 0.781          |
| rs368794                     | <i>KCTD15</i> | 0.079 (0.000–0.158)                     | 0.049                  | 1.068 (0.976–1.170)                       | 0.152          | 1.013 (1.000–1.026)                                    | 0.252                                                 | 1.053 (0.960–1.155)                                        | 0.276          |
| Genetic predisposition score |               | 0.154 (0.130–0.178)                     | 9.11×10 <sup>-37</sup> | 1.036 (1.008–1.065)                       | 0.010          | 1.025 (1.021–1.030)                                    | 0.446                                                 | 1.006 (0.978–1.034)                                        | 0.676          |

<sup>a</sup>Regression coefficient representing the effect per risk allele on BMI, adjusted for age and sex

<sup>b</sup>Expected association with type 2 diabetes was calculated based on the association of the individual SNPs or the score with BMI and the association of BMI with type 2 diabetes (including prevalent and incident cases)
